# Supplementary material
Source: Springer Nature journal article supplement (https://www.springermedizin.de/resource/supplementary/12889_2011_3398_MOESM1_ESM.pdf/9488962)

**Search terms :**

- return to work
- occupational therapy
- occupational rehabilitation
- vocational rehabilitation

**Electronic sources: (1532)**

- Pubmed : 792
- CINAHL : 611
- Cochrane library: 63
- Eric (ebSCO) : 4
- psycINFO (ovidSP): 62

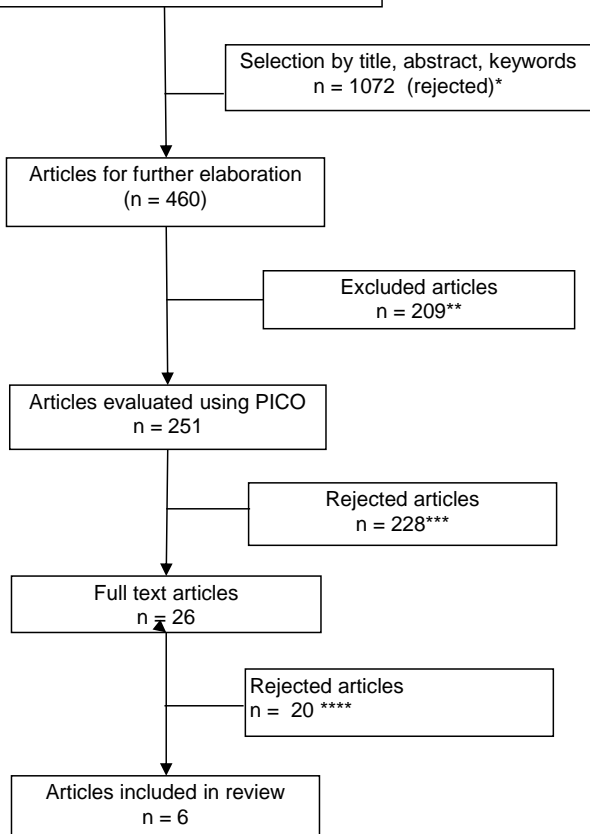

Supplement: MOESM1 [file 9488962]
